# Supplementary material for: Effects of Ovine Monocyte-Derived Macrophage Infection by Recently Isolated Toxoplasma gondii Strains Showing Different Phenotypic Traits
Source: MDPI journal article supplement (doi:10.3390/ani12243453), 2022-12-07
Supplement: s1 [file s1]

**Table S1.** Sequences of primers used for quantitative real-time PCR (qPCR) and standard curve data.

| Target <sup>1</sup>                             | Primer            | Primer sequence (5'-3')  | Product size (bp) | R <sup>2</sup> | Slope  |
|-------------------------------------------------|-------------------|--------------------------|-------------------|----------------|--------|
| $\beta$ -actin <sup>a</sup><br>(NM_001009784.1) | $\beta$ -actin-UP | ACACCGCAACCAGTTCGCCAT    | 216               | 0.995          | -3.334 |
|                                                 | $\beta$ -actin-RP | GTCAGGATGCCTCTCTTGCT     |                   |                |        |
| IL-4 <sup>a</sup><br>(XM_004008636.1)           | IL4-UP            | CTGCCCCAAAGAACGCAACT     | 154               | 0.996          | -3.659 |
|                                                 | IL4-RP            | TCATTCACAGAACAGGTCTTGCTT |                   |                |        |
| IL-10 <sup>a</sup><br>(NM_001009327.1)          | IL10-UP           | TGCTGGATGACTTTAAGGGTTACC | 60                | 0.999          | -3.957 |
|                                                 | IL10-RP           | AAAACCTGGATCATTTCCGACAAG |                   |                |        |
| IL-12p40 <sup>a</sup><br>(NM_001009438.1)       | IL12-UP           | ATGGAATTTGGTCCACTGATATT  | 95                | 0.995          | -3.613 |
|                                                 | IL12-RP           | GTGAAGTGTCCAGAATAATCCTTT |                   |                |        |
| TNF- $\alpha$ <sup>a</sup><br>(NM_001024860.1)  | TNF- $\alpha$ -UP | CCAGAGGGAAGAGCAGTCC      | 126               | 0.944          | -3.131 |
|                                                 | TNF- $\alpha$ -RP | GGAGCGCTGATGTTGGCTAC     |                   |                |        |
| TGF- $\beta$ <sup>a</sup><br>(NM_001009400.1)   | TGF- $\beta$ -UP  | GGTGAATACGGCAACAAAA      | 117               | 0.989          | -3.556 |
|                                                 | TGF- $\beta$ -RP  | CGAGAGAGCAACACAGGTTC     |                   |                |        |
| IL17 <sup>b</sup><br>(XM_004018887.4)           | IL-17UP           | AGTCTGGTGGCTCTTGTGAA     | 113               | 0.991          | -3.641 |
|                                                 | IL-17RP           | TTAACGATGTTTCAGGTTGAC    |                   |                |        |
| IL-6 <sup>b</sup><br>(X68723.1)                 | IL-6-UP           | CTGGGTTCATCAGGCGATT      | 150               | 0.987          | -3.742 |
|                                                 | IL-6-RP           | GGATCTGGATCAGTGTCTGA     |                   |                |        |
| IL1- $\alpha$ <sup>c</sup><br>(XM_012159802.3)  | IL1- $\alpha$ -UP | CTGGGAAAAGCATGGGTCTA     | 89                | 0.983          | -3.317 |
|                                                 | IL1- $\alpha$ -RP | TGTGCACCAGTTTTCTTGC      |                   |                |        |
| iNOS <sup>b</sup><br>(AF223942.1)               | iNOS-UP           | GAGGAAGTGGGCAGAAGGAT     | 176               | 0.999          | -3.34  |
|                                                 | iNOS-RP           | AAGTACATGCAGAACGAGTA     |                   |                |        |

<sup>1</sup> NCBI accession number are for ovine cDNA sequences. Primer annealing was also checked with the *Ovis aries* genomic DNA sequences <sup>a</sup> Primers described by Arranz et al., 2016. <sup>b</sup> Primers described by Arteche-Villasol et al., 2021. <sup>c</sup> Primers first described in this study.

**Table S2.** Mean and standard deviation of the cell infection rate (cIR) according to each isolate used for infection, the number of experiment and the number of replicates made of each isolate.

| Isolate<br>(genotype/origin)                                | Experiment<br>no | Replica | Cell infection<br>rate |              | Total         |
|-------------------------------------------------------------|------------------|---------|------------------------|--------------|---------------|
| TgShSp1<br>(#3/abortion)                                    | 1                | A       | 70.29 ± 9.01           | 60.94        | 60.16 ± 12.71 |
|                                                             |                  | B       | 51.60 ± 16.32          | ±12.62       |               |
|                                                             | 2                | A       | 65.21 ± 13.01          | 60.67        |               |
|                                                             |                  | B       | 56.14 ± 7.02           | ±10.01       |               |
|                                                             | 3                | A       | 67.47 ± 23.01          | 58.88        |               |
|                                                             |                  | B       | 50.30 ± 8.01           | ±15.51       |               |
| TgShSp2<br>(#1/abortion)                                    | 1                | A       | 87.12 ± 13.02          | 81.24±       | 80.15 ± 8.91  |
|                                                             |                  | B       | 75.37 ± 11.23          | 12.12        |               |
|                                                             | 2                | A       | 85.46 ± 6.04           | 80.26 ± 6.53 |               |
|                                                             |                  | B       | 75.06 ± 7.02           |              |               |
|                                                             | 3                | A       | 81.90 ± 7.01           | 78.97 ± 8.07 |               |
|                                                             |                  | B       | 76.05 ± 9.05           |              |               |
| TgShSp3<br>(#3/abortion)                                    | 1                | A       | 75.50 ± 7.02           | 74.71 ± 7.51 | 64.92 ± 9.85  |
|                                                             |                  | B       | 73.93 ± 8.01           |              |               |
|                                                             | 2                | A       | 59.00 ± 14.03          | 49.70        |               |
|                                                             |                  | B       | 40.41 ± 7.04           | ±11.02       |               |
|                                                             | 3                | A       | 75.40 ± 9.04           | 70.37        |               |
|                                                             |                  | B       | 65.35 ± 13.02          | ±11.03       |               |
| TgShSp11<br>(#3/myocardium<br>of chronic<br>infected sheep) | 1                | A       | 85.38 ± 11.03          | 81.18 ± 9.17 | 71.19 ± 9.13  |
|                                                             |                  | B       | 76.98 ± 7.32           |              |               |
|                                                             | 2                | A       | 63.34 ± 10.34          | 69.77 ± 9.22 |               |
|                                                             |                  | B       | 76.21 ± 8.11           |              |               |
|                                                             | 3                | A       | 66.18 ± 7.01           | 62.62 ± 9.01 |               |
|                                                             |                  | B       | 59.06 ± 11.01          |              |               |
| TgShSp16<br>(#3/myocardium<br>of chronic<br>infected sheep) | 1                | A       | 65.43 ± 20.02          | 70.44        | 71.98 ± 12.20 |
|                                                             |                  | B       | 75.46 ± 18.02          | ±19.02       |               |
|                                                             | 2                | A       | 72.43 ± 14.02          | 71.18        |               |
|                                                             |                  | B       | 69.93 ± 6.04           | ±10.03       |               |
|                                                             | 3                | A       | 69.63 ± 7.02           | 74.34 ± 7.56 |               |
|                                                             |                  | B       | 79.06 ± 8.11           |              |               |
| TgShSp24<br>(#2/myocardium<br>of chronic<br>infected sheep) | 1                | A       | 92.46 ± 5.03           | 93.21 ± 3.52 | 93.51 ± 5.71  |
|                                                             |                  | B       | 93.97 ± 2.02           |              |               |
|                                                             | 2                | A       | 89.66 ± 7.09           | 91.60 ± 6.06 |               |
|                                                             |                  | B       | 93.55 ± 5.03           |              |               |
|                                                             | 3                | A       | 94.75 ± 12.00          | 95.73 ± 7.52 |               |
|                                                             |                  | B       | 96.72 ± 3.04           |              |               |

**Table S3.** Mean and standard deviation of the cell infection rate (McR) according to each isolate of infection used, the number of experiment and the number of replicates made of each isolate.

| Isolate<br>(genotype/origin)                                | Experiment<br>no | Replica | Multiinfected<br>cell rate |               | Total            |
|-------------------------------------------------------------|------------------|---------|----------------------------|---------------|------------------|
| TgShSp1<br>(#3/abortion)                                    | 1                | A       | 58.97 ± 14.02              | 50.42 ± 14.06 | 40.95 ±<br>12.69 |
|                                                             |                  | B       | 41.87 ± 14.10              |               |                  |
|                                                             | 2                | A       | 32.63 ± 10.00              | 33.78 ± 9.51  |                  |
|                                                             |                  | B       | 34.94 ± 9.02               |               |                  |
|                                                             | 3                | A       | 49.28 ± 18.02              | 38.67 ± 14.52 |                  |
|                                                             |                  | B       | 28.07 ± 11.02              |               |                  |
| TgShSp2<br>(#1/abortion)                                    | 1                | A       | 83.27 ± 17.12              | 68.79 ± 13.06 | 56.21 ±<br>10.57 |
|                                                             |                  | B       | 54.31 ± 9.01               |               |                  |
|                                                             | 2                | A       | 62.98 ± 10.01              | 53.03 ± 8.55  |                  |
|                                                             |                  | B       | 43.08 ± 7.10               |               |                  |
|                                                             | 3                | A       | 62.05 ± 7.10               | 46.81 ± 10.10 |                  |
|                                                             |                  | B       | 31.58 ± 13.10              |               |                  |
| TgShSp3<br>(#3/abortion)                                    | 1                | A       | 59.64 ± 16.01              | 55.43 ± 14.01 | 49.11 ± 17.19    |
|                                                             |                  | B       | 51.23 ± 12.01              |               |                  |
|                                                             | 2                | A       | 32.66 ± 17.01              | 38.47 ± 21.56 |                  |
|                                                             |                  | B       | 44.28 ± 26.12              |               |                  |
|                                                             | 3                | A       | 59.31 ± 18.01              | 53.44 ± 16.01 |                  |
|                                                             |                  | B       | 47.58 ± 14.02              |               |                  |
| TgShSp11<br>(#3/myocardium<br>of chronic<br>infected sheep) | 1                | A       | 83.92 ± 5.01               | 61.58 ± 4.01  | 44.84 ± 5.02     |
|                                                             |                  | B       | 39.25 ± 3.02               |               |                  |
|                                                             | 2                | A       | 42.70 ± 7.01               | 38.15 ± 6.06  |                  |
|                                                             |                  | B       | 33.61 ± 5.12               |               |                  |
|                                                             | 3                | A       | 51.16 ± 5.00               | 34.81 ± 5.00  |                  |
|                                                             |                  | B       | 18.46 ± 5.00               |               |                  |
| TgShSp16<br>(#3/myocardium<br>of chronic<br>infected sheep) | 1                | A       | 59.91 ± 17.21              | 48.28 ± 13.11 | 47.76 ± 9.39     |
|                                                             |                  | B       | 36.66 ± 9.02               |               |                  |
|                                                             | 2                | A       | 56.34 ± 16.12              | 41.02 ± 9.56  |                  |
|                                                             |                  | B       | 25.71 ± 3.00               |               |                  |
|                                                             | 3                | A       | 70.77 ± 8.01               | 53.98 ± 5.51  |                  |
|                                                             |                  | B       | 37.20 ± 3.02               |               |                  |
| TgShSp24<br>(#2/myocardium<br>of chronic<br>infected sheep) | 1                | A       | 81.28 ± 8.02               | 61.54 ± 5.56  | 65.03 ± 4.59     |
|                                                             |                  | B       | 41.80 ± 3.10               |               |                  |
|                                                             | 2                | A       | 79.55 ± 10.00              | 60.56 ± 7.05  |                  |
|                                                             |                  | B       | 41.57 ± 4.11               |               |                  |
|                                                             | 3                | A       | 98.19 ± 1.12               | 72.99 ± 1.17  |                  |
|                                                             |                  | B       | 47.79 ± 1.23               |               |                  |

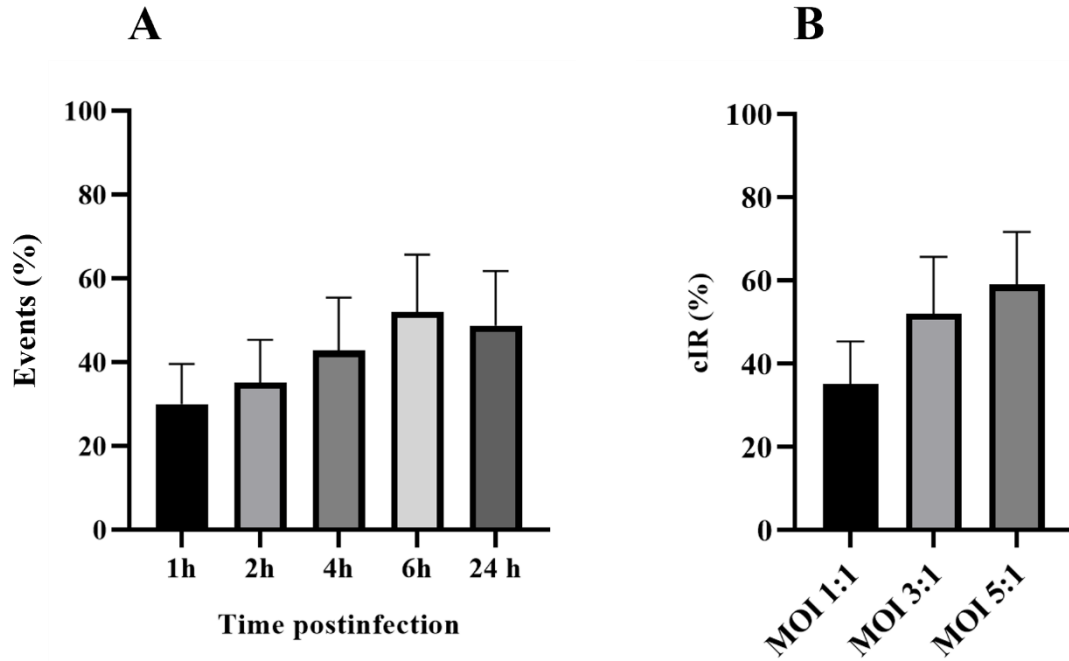

**Figure S1. Previous in vitro studies carried out with *T. gondii* and ovine monocyte-derived macrophages to define time point of infection and MOI. A.** Parasite invasion rates in ovine monocyte-derived macrophages infected by TgShSpain 1 isolate. Graphs represent percentage of internalized and intact tachyzoites studied at different time points. Each column and error bar represents the mean and the SD. The total number of internalized tachyzoites was determined by single immunofluorescence staining of events followed by counting using an inverted fluorescence microscope. **B.** Graphs represent the cell infection rates at 6 hours postinfection as the percentage of infected cells and multi-infected cells in ovine monocyte-derived macrophages for TgShSpain1 isolate. Each column and error bar represents the mean value and SD using MOIs of 1, 3 and 5. The total number of cells and the number of infected cells was determined by double immunofluorescence staining followed by counting using an inverted fluorescence microscope.

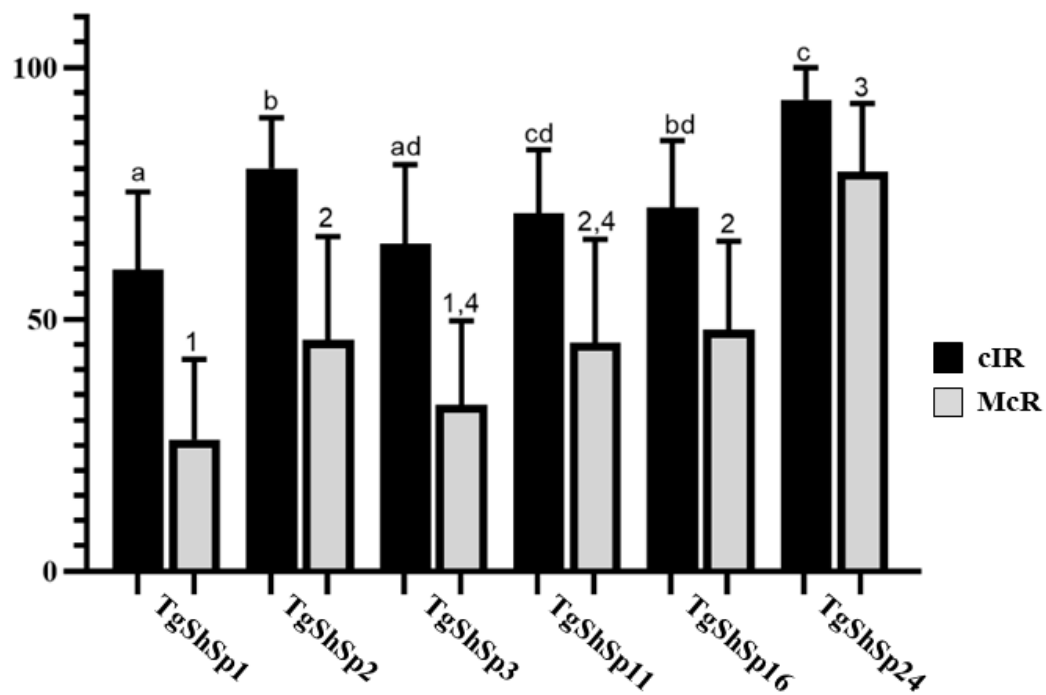

**Figure S2. Cell infection rate (cIR) and multi-infected cell rate (McR) at 6 hpi in OvMØs for the six *Toxoplasma gondii* isolates using MOI of 3:1.** The total number of cells, the number of infected cells (with intact tachyzoites) and the number of cells with multi-infection were determined by double immunofluorescence staining followed by counting using an inverted fluorescence microscope. Different superscript letters indicate statistically significant differences between pairs of the six isolates regarding cIR (Mann-Whitney test) ( $p \leq 0.05$ ). Different superscript numbers indicate statistically significant differences between pairs of the six isolates regarding McR (Mann-Whitney test) ( $p \leq 0.05$ ).

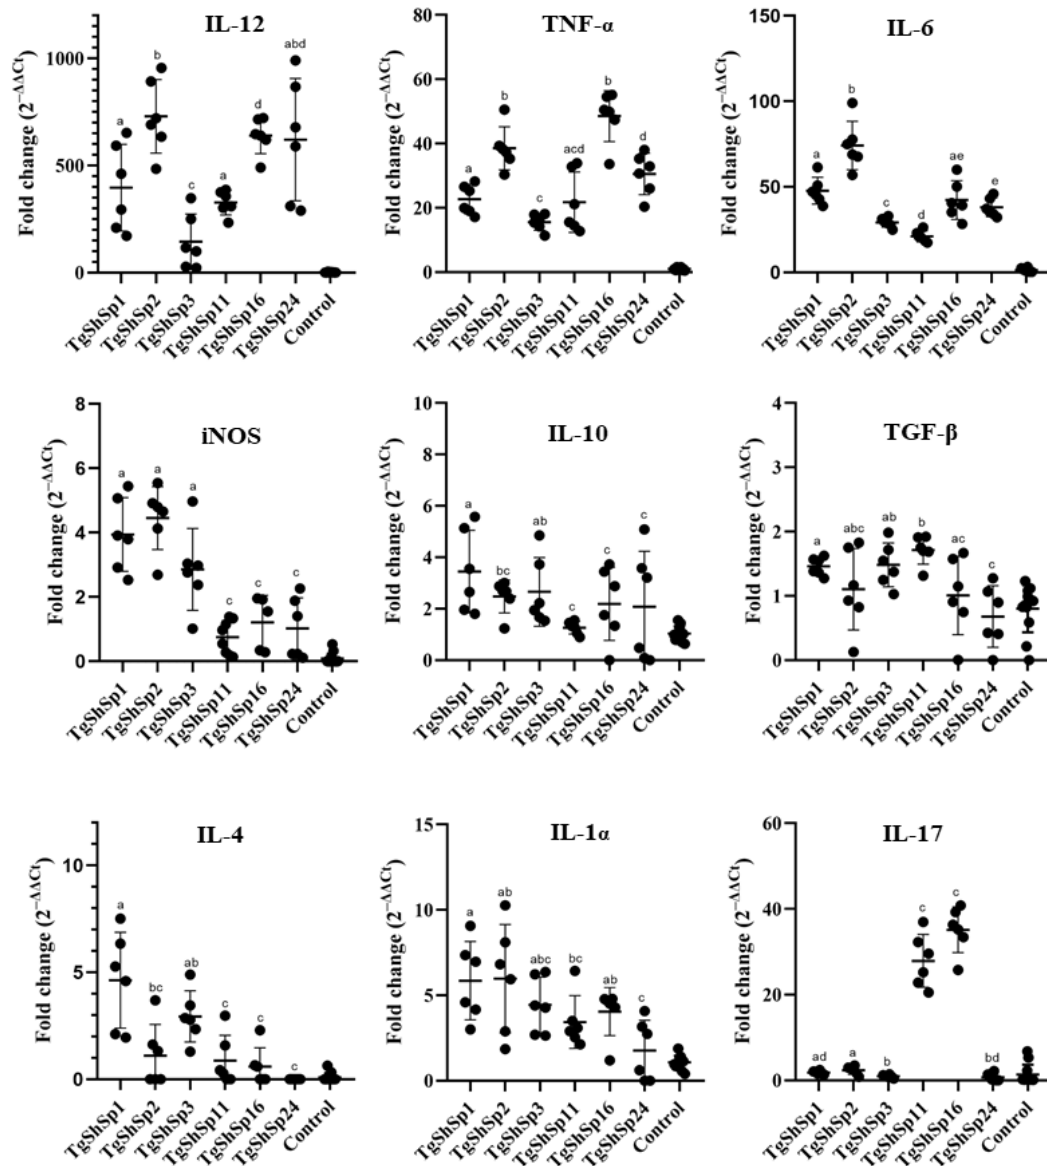

**Figure S3. IL-12, TNF-α, IL-6, iNOS, IL-10, TGF-β, IL-4, IL-1α and IL-17 transcript expression.** Scatter plot graphs of relative mRNA expression levels (as a fold change) of cytokines and iNOS in OvMØs infected with different *Toxoplasma gondii* isolates (MOI 3:1) at 6 hpi. Isolates: TgShSp1, TgShSp2, TgShSp3, TgShSp11, TgShSp16, TgShSp24. Data represent mean and standard deviation. Different superscript letters indicate statistically significant differences between pairs of isolates (Mann-Whitney test) ( $p \leq 0.05$ ).
